# Supplementary material
Source: publisher figshare collection journal article supplement (https://acs.figshare.com/ndownloader/files/4315054)
Supplement: Supplementary file 1 [file 4315054]

## SUPPORTING INFORMATION

Ferromagnetic Interactions in an Unusual 2D Coordination Polymer Including Di-2-pyridylketone, (1,1)-Azide, and Rare (1,1,3,3)-Azide Bridging Ligands

Noelia De la Pinta,<sup>†</sup> Zurine Serna,<sup>†</sup> Gotzon Madariaga,<sup>‡</sup> M. Karmele Urtiaga,<sup>§</sup> M. Luz Fidalgo,<sup>#</sup> and Roberto Cortés\*,<sup>†</sup>

### S1. Experimental: Synthesis, Elemental Analysis, Experimental Procedures.

*Synthesis and Analysis of 1.* The synthesis of **1** was carried out in a diffusive cell with three compartments. The wing compartments contained (right) an aqueous solution of Cu(NO<sub>3</sub>)<sub>2</sub>·3H<sub>2</sub>O (0.5 mmol) and (left) a methanolic solution of dpk (0.5 mmol) and NaN<sub>3</sub> (0.5 mmol), while the central one contained a mixture of methanol and water (1:1). After several days, prismatic, green, X-ray quality single crystals (43% yield) were obtained in both the central and right compartments. Anal. Calcd for C<sub>12</sub>H<sub>11</sub>N<sub>11</sub>O<sub>2</sub>Cu<sub>2</sub>: Cu, 27.13; C, 30.77; H, 2.37; N, 32.89. Found: Cu, 26.8; C, 30.5; H, 2.6; N, 33.0.

*Physical Measurements.* Microanalyses were performed with a LECO CHNS-932 analyzer. Analytical measurements were carried out in an ARL 3410 + ICP with a Minitorch equipment. IR spectroscopy was performed on a Nicolet 520 FTIR spectrophotometer in the 400-4000 cm<sup>-1</sup> region. Magnetic susceptibility measurements of powdered samples were carried out in the temperature range 4.2-300 K, at a value of the magnetic field of 0.1 T, using a Quantum Design MPM5-7 SQUID magnetometer, equipped with a helium continuous-flow cryostat. The experimental susceptibilities were corrected for the diamagnetism of the constituent atoms (Pascal tables). Magnetization measurements were carried out at 5 K and 10 K at increasing values of the magnetic field up to 7 T.

## S2. IR spectra for compound 1 and dpk Ligand.

**Table S1.** Significant data of the IR spectrum of  $[\text{Cu}_4(\text{dpk.OCH}_3)_2(\text{N}_3)_6]_n$  and of the organic di-2-piridilketone ligand.

|                                                  | Di-2-piridilketone<br>(dpk) ( $\text{cm}^{-1}$ ) | $[\text{Cu}_4(\text{dpk.OCH}_3)_2(\text{N}_3)_6]_n$<br>( $\text{cm}^{-1}$ ) |
|--------------------------------------------------|--------------------------------------------------|-----------------------------------------------------------------------------|
| <b>Organic ligand</b>                            |                                                  |                                                                             |
| $\nu(\text{CO})$                                 | 1680s                                            | 1603s                                                                       |
| $\nu(\text{C}=\text{C}), \nu(\text{C}=\text{N})$ | 1578s, 1565m                                     | 1580m                                                                       |
| $\nu$ Pyridine ring                              | 998m                                             | 980m                                                                        |
| C-H out-of-plane bending                         | 753s, 742s                                       | 780m, 765m                                                                  |
| pyridyl ring in-plane vibration                  | 662m                                             | 650m                                                                        |
| <b>Azide ligand</b>                              |                                                  |                                                                             |
| $\nu_{\text{as}}(\text{N}_3)$                    |                                                  | 2090s, 2050s                                                                |
| $\nu_{\text{s}}(\text{N}_3)$                     |                                                  | 1340w,o                                                                     |
| $\delta(\text{N}_3)$                             |                                                  | 647m                                                                        |

s= strong, m= medium, w= weak, o= overlap

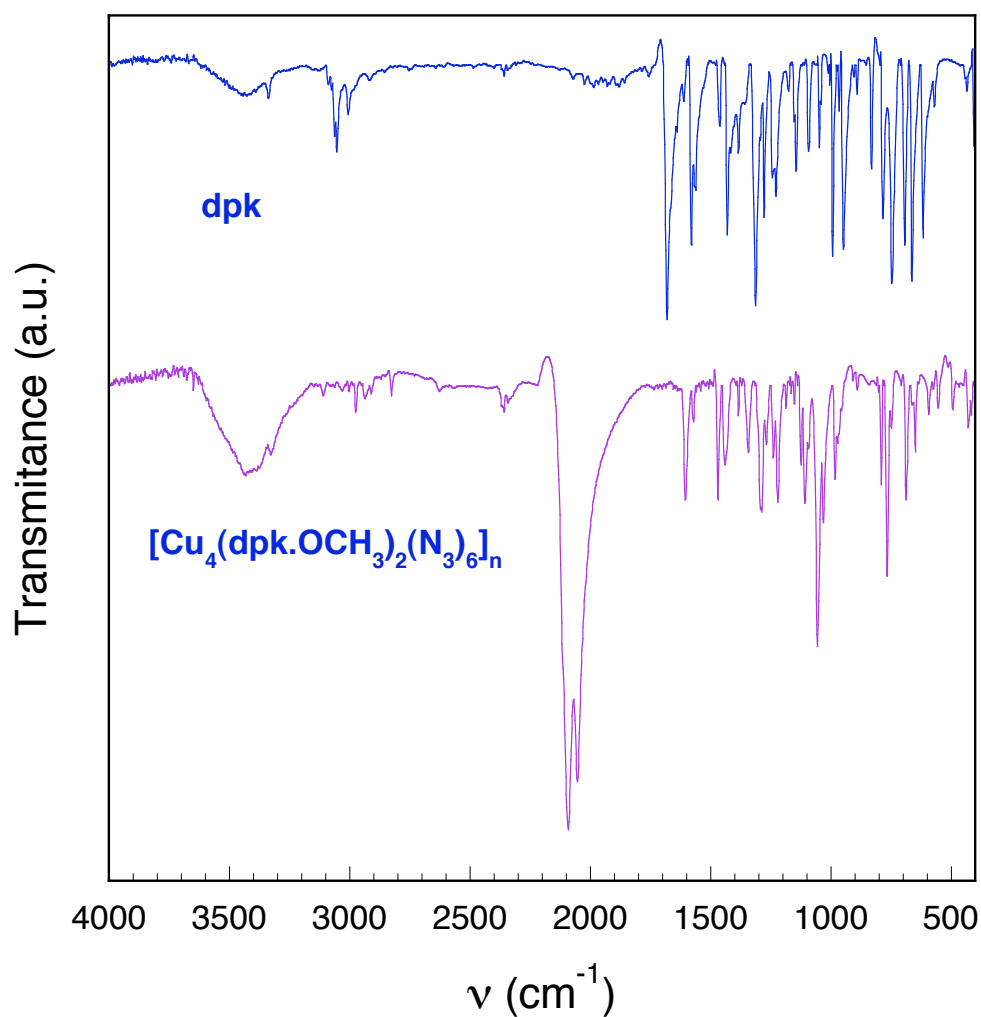

Figure S1. IR spectra of  $[\text{Cu}_4(\text{dpk.OCH}_3)_2(\text{N}_3)_6]_n$  and of dpk ligand.

### S3. Different structural views.

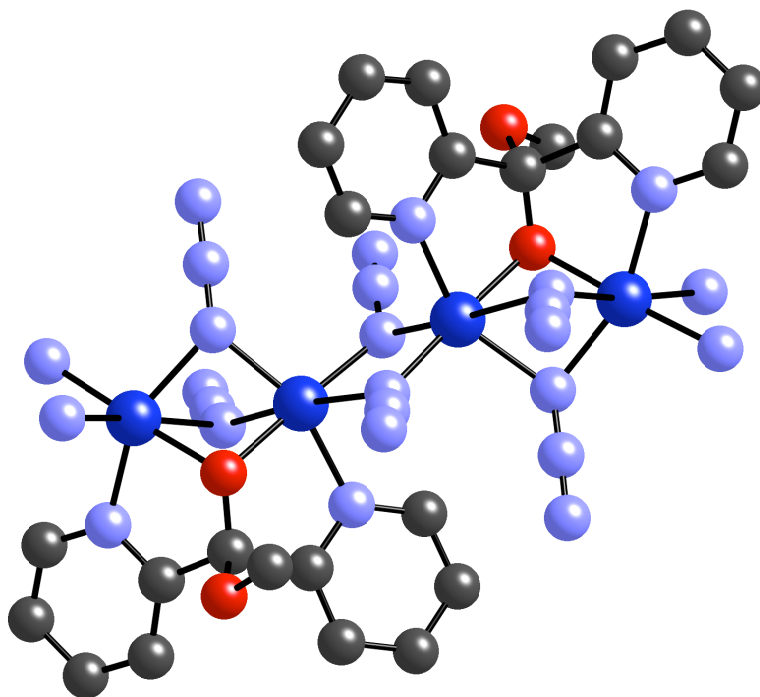

Figure S2. Global connection in each copper(II) ion in the tetramer.

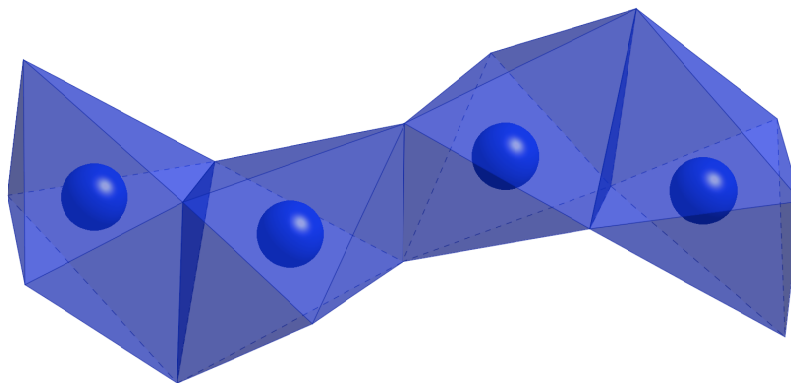

Figure S3. Distorted octahedral disposition in the tetramer.

#### S4. Different structural views.

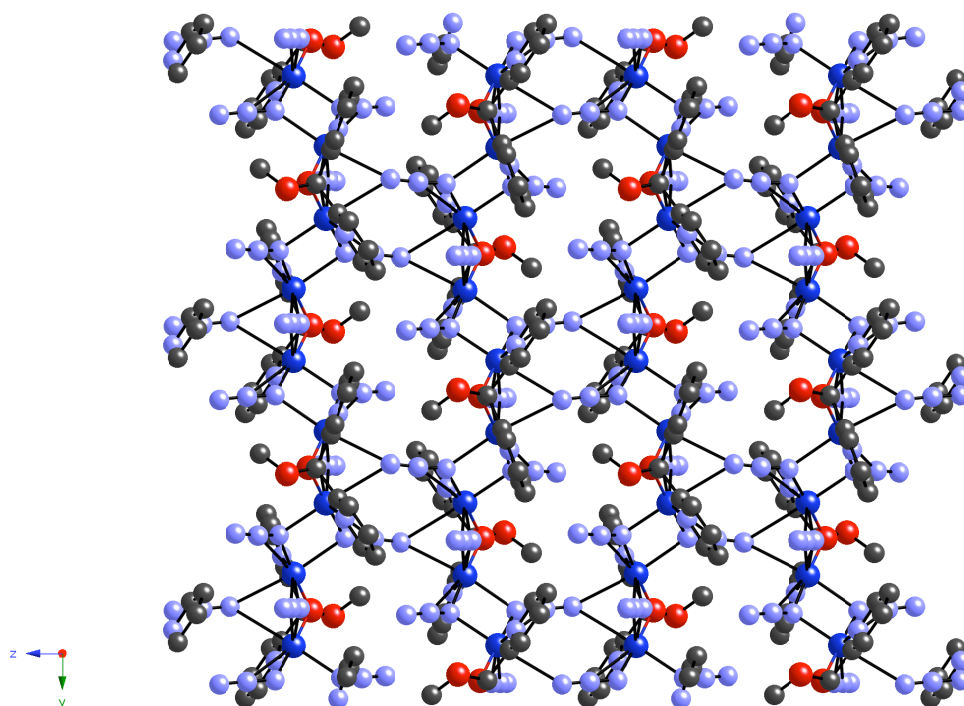

Figure S4. Global 2D structure in the (100) plane.

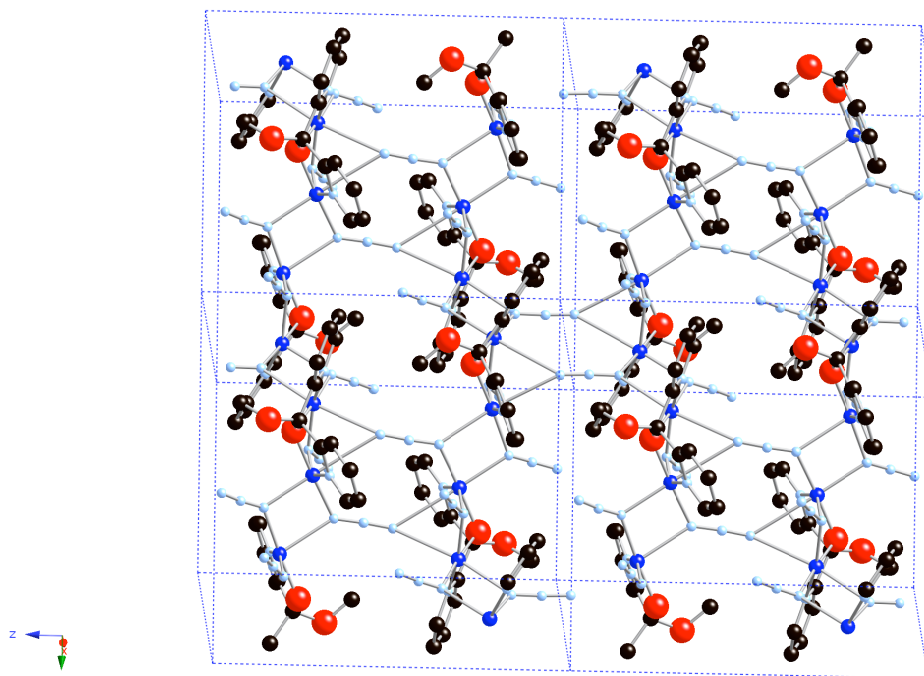

Figure S5. Disposition of 2D structure in the cell.

## S5. Tentative fits to magnetic models.

- Exchange constant  $J$  for dimers with  $S=1/2^a$ : solid magenta line in Figure S. Eq. 1:

$$\chi_m = \frac{Ng^2\beta^2}{3kT} \frac{1}{1 + \frac{\exp(-2J/kT)}{3}} \quad (1)$$

- Dimer + interdimeric exchange as an interdimer molecular field<sup>b</sup>: green discontinuous line. Eq. 2:

$$\chi = \frac{\chi_m}{(1 - \frac{2k}{Ng^2\beta^2} zJ' \chi_m)} \quad (2)$$

- Dimer + low-temperature antiferromagnetic exchange as an interdimer molecular field<sup>c</sup>: discontinuous red line

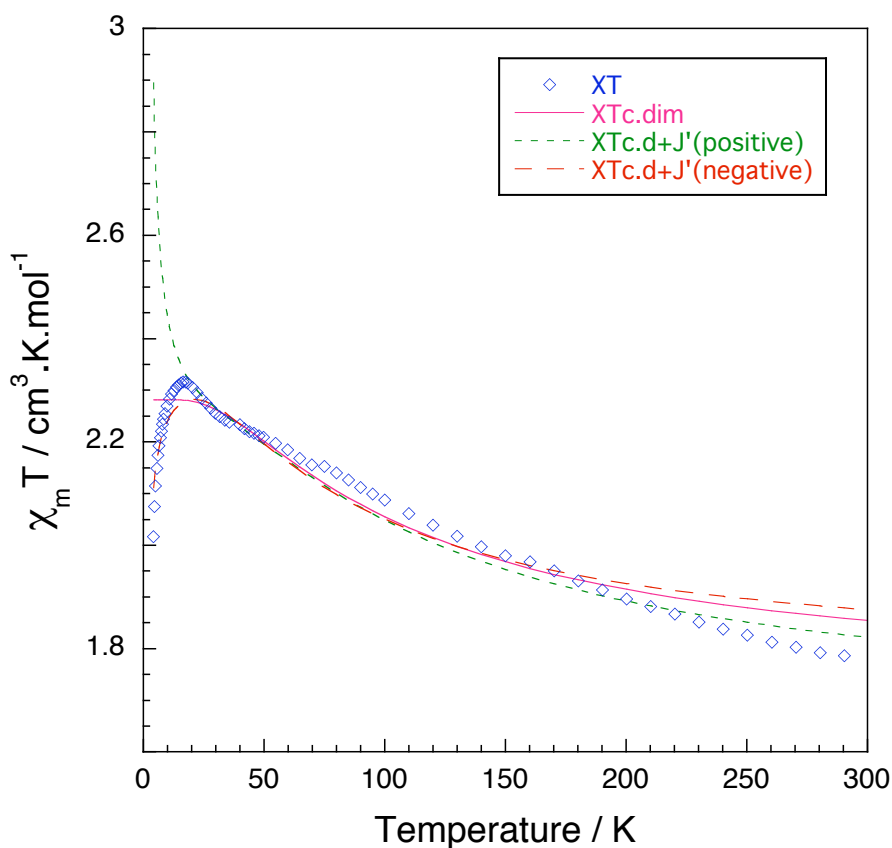

Figure S6. Tentative fits to indicate models (per 4 copper(II) ions).

\*All expressions based upon the Hamiltonian:  $H = -2J \sum S_1 S_2$

<sup>a</sup> Bleaney, B.; Bowers, K. D. *Proc. R. Soc. London Ser. A*, **1952**, 214, 451.

<sup>b</sup> Shen, Z.; Zuo, J.-L.; Yu, Z.; Zhang, Y.; Bai, J.-F.; Che, C.-M.; Fun, H.-K.; Vittal, J. J.; You, X.-Z. *J. Chem. Soc. Dalton Trans.* **1999**, 3393-3398.

<sup>c</sup> Shen, Z.; Zuo, J.-L.; Gao, S.; Song, Y.; Che, C.-M.; Fun, H.-K.; You, X.-Z. *Angew. Chem., Int. Ed.* **2000**, 39, 3633-3635.
